# Supplementary material
Source: Elsevier journal article supplement (https://www.sciencedirect.com/science/article/pii/S2445146019300299)
Supplement: mmc1 [file S2445146019300299:mmc1.docx]

**Apéndice**

**CONSENTIMIENTO INFORMADO PARA PADRES Y CUIDADORES DE NIÑOS**

“Oportunidades Perdidas de Vacunación en Centros de Salud de atención primaria en Ecuador”

**Introducción**

El Ministerio de Salud Pública del Ecuador, en colaboración con la Pontificia Universidad Católica del Ecuador y la Organización Panamericana de la Salud, le invita a participar en el presente estudio, el cual tiene el objetivo de estimar las oportunidades pérdidas de vacunación en niños menores de 5 años, para ello, estamos aplicando una entrevista sobre vacunación a las personas que acompañan a niños menores de 5 años, a la salida de los establecimientos de salud.

**Objetivo**

El objetivo del estudio es estimar las Oportunidades Pérdidas de Vacunación en Centros de Salud de primer nivel de atención de Quito-Ecuador año 2017. Con ese fin, solicitamos su participación para responder este cuestionario.

**Procedimientos**

Si usted acepta participar, le haremos algunas preguntas sobre el motivo de su visita a este establecimiento de salud. Específicamente, le preguntaremos si el niño al que Ud. acompaña recibió alguna vacuna y si está satisfecho con la atención recibida. La entrevista tendrá una duración aproximada de 15 minutos.

Usted está en la potestad de NO contestar preguntas cuando lo considere necesario.

**Confidencialidad**

La información que proporcione es estrictamente confidencial y anónima; solamente le asignaremos un número de registro al que únicamente tendrá acceso el responsable de la aplicación de este cuestionario y será custodiada por la investigadora principal del proyecto (Dra. Ruth Jimbo)

**Riesgos potenciales**

Las preguntas que le haremos no presentan ningún riesgo potencial, sin embargo, si alguna de ellas le causa incomodidad, tiene derecho a no responderla.

**Tiempo de Participación**

Hemos calculado que su participación en este estudio durará 15 minutos aproximadamente. Su participación en este estudio será sólo por una ocasión no se le pedirá regresar por otros procedimientos.

**Participación voluntaria/Retiro**

Su participación en la entrevista es estrictamente voluntaria. Usted está en plena libertad de suspender la entrevista si así lo desea, sin afectar su derecho a seguir usando los servicios del establecimiento de salud.

**Los Resultados**

Los resultados finales serán difundidos a los encargados de cada Distrito de Salud a través de un taller de presentación de resultados que contará con la presencia de las autoridades del Ministerio de Salud Pública del Ecuador, con el objetivo de implementar planes que permitan mejorar los resultados de cobertura de vacunación, en caso de que sean requeridos, lo cual mejorará directamente la atención que usted y su familia recibe a través de la inmunización.

**Costos, incentivos y beneficios**

Su participación en este estudio no tiene ningún costo y no recibirá ningún incentivo económico por participar en este estudio. Usted no recibirá pago alguno por su participación en esta investigación. Sin embargo, su colaboración contribuirá a la elaboración de intervenciones de capacitación para el fortalecimiento de las competencias técnicas en inmunización en su Distrito.

**Contactos**

Si tiene alguna pregunta, observación o preocupación con respecto al cuestionario, le damos la información del responsable del estudio.

Ruth Jimbo Md.

Pontificia Universidad Católica del Ecuador

12 de octubre y Roca

095005177

[rejimbo@puce.edu.ec](mailto:rejimbo@puce.edu.ec)

Si tiene dudas sobre asuntos éticos con relación a esta investigación, puede ponerse en contacto con el Comité de Bioética de la Pontificia Universidad Católica del Ecuador, que ha aprobado esta investigación.

**Contacto Comité de Ética PUCE**

Comité de ética de la Pontificia Universidad Católica del Ecuador

Dr. Rommel Montufar. Secretario del Comité

Pontificia Universidad Católica del Ecuador

Dirección: Av. 12 de octubre y Roca

Teléfono 2991700

**FIRMA DEL CONSENTIMIENTO**

He sido invitada/o a participar en la investigación sobre “Oportunidades Perdidas de Vacunación en los Centros de Salud de primer nivel de atención del Distrito 17D05 de la ciudad de Quito -Ecuador”

Entiendo que incluirán a los padres o cuidadores de niños menores de 5 años que acuden a atención en los centros de primer nivel del Distrito 17D05 de Quito-Ecuador. Estoy informado/a de que mi participación no tendrá ningún costo para mí o mi familia. Este estudio contribuirá a identificar las oportunidades pérdidas de vacunación en niños menores de 5 años en este Distrito de Salud. Entiendo que este estudio no me dará ningún incentivo económico por mi participación. El beneficio directo que recibiré del estudio es que, con la información remitida a los responsables de mi Centro de Salud y mi Distrito de Salud, se puedan plantear estrategias para mejorar los procesos de vacunación en caso de que fuere necesario.

Conozco los números de teléfono y los correos electrónicos de los investigadores quienes pueden solventar todas mis preguntas o inquietudes relacionadas con la investigación.

He leído (o me han leído) la información proporcionada. He tenido la oportunidad de preguntar sobre ella y me han contestado en forma sencilla y satisfactoria las preguntas que he tenido.

Acepto voluntariamente participar en esta investigación y entiendo que tengo el derecho de no contestar alguna pregunta si así fuese mi deseo, sabiendo que esto no repercutirá en el ámbito de mi atención de salud.

**Firmo, Acepto libre y voluntariamente participar en esta investigación.**

Firma (o huella dactilar): _______________________________

Fecha ________________

**Datos del Trabajador de Salud que lleva a cabo el procedimiento informado:**

Nombre y apellidos: _________________________

Firma: ________________

**Fuentes de financiación**: No existieron fuentes de financiamiento.

# Referencias

1. OMS. Vaccine-preventable diseases and vaccines 6.1 General considerations. https://www.who.int/ith/ITH-Chapter6.pdf

2. Goetz MB, Maglione MA, Das L, Gidengil C, Smith A, Shanman R, et al. Safety of Vaccines Used for Routine Immunization of US Children: A Systematic Review. Pediatrics. 2014;134(2):325-37.

3. OMS | Inmunización. WHO. 2017;

4. OPS. Metodología para la evaluación de oportunidades perdidas de vacunación. Vol. 21, Revista Paraense de Medicina. 2007. 61-62 p.

5. Ministerio de Salud Pública del Ecuador (MSP). Evaluación de la Estrategia Nacional de Inmunizaciones Ecuador 2017. 2017 p. 126.

6. OMS. Missed opportunities for inmunization. 1993.

7. Gentile A, Bakir J, Firpo V, Caruso M, Lución MF, Abate HJ, et al. Esquemas atrasados de vacunación y oportunidades perdidas de vacunación en niños de hasta 24 meses: estudio multicéntrico. Arch Argent Pediatría. 2011;109(3):219-25.

8. Castillo Solórzano C, Da Cunha C, Olive JM, Zeitz P, Zeissig BO. Oportunidades perdidas de vacunación. Estrategias de intervención. 1990.

9. Pérez-Cuevas R, Reyes H, Pego U, Tomé P, Ceja K, Flores S, et al. Immunization promotion activities: are they effective in encouraging mothers to immunize their children? Soc Sci Med 1982. octubre de 1999;49(7):921-32.

10. Luman ET, McCauley MM, Stokley S, Chu SY, Pickering LK. Timeliness of childhood immunizations. Pediatrics. noviembre de 2002;110(5):935-9.

11. Sabnis SS, Pomeranz AJ, Lye PS, Amateau MM. Do Missed Opportunities Stay Missed? A 6-Month Follow-up of Missed Vaccine Opportunities in Inner City Milwaukee Children. Pediatrics. 1998;101(5).

12. WHO | Missed Opportunities for Vaccination (MOV) Strategy [Internet]. WHO. [citado 25 de febrero de 2019]. Disponible en: http://www.who.int/immunization/programmes_systems/policies_strategies/MOV/en/

13. Khaliq A, Sayed SA, Hussaini SA, Azam K, Qamar M. Missed Immunization Opportunities Among Children Under 5 Years Of Age Dwelling In Karachi City. J Ayub Med Coll Abbottabad JAMC. 2017;29(4):645-9.

14. Diaz-Ortega JL, Velandia-González M, Trumbo SP, Vargas AL, Danovaro-Holliday MC, Garib Z, et al. Missed Opportunities for Vaccination in the Dominican Republic: Results of an Operational Investigation. BioMed Res Int. 2016;2016(October 2012):1-9.

15. Narváez J, Osorio MB, Castañeda-Orjuela C, Alvis Zakzuk N, Cediel N, Chocontá-Piraquive LÁ, et al. Is Colombia reaching the goals on infant immunization coverage? A quantitative survey from 80 municipalities. Vaccine. 2017;35(11):1501-8.

16. Sridhar S, Maleq N, Guillermet E, Colombini A, Gessner BD. A systematic literature review of missed opportunities for immunization in low- and middle-income countries. Vaccine. 2014;32(51):6870-9.

**Tablas**

Tabla 1 Características de la población

| **Variable** | **N (%)** |
| --- | --- |
| **Cuidador** |  |
| *Sexo*  Femenino  Masculino | 338 (91,85)  30 (8,25) |
| *Relación con niño*  Madre o Padre  Abuela o Abuelo  Tío o Tía  Cuidador contratado  Otro | 320 (85,96)  22 (5,98)  21 (5,71)  3 (0,82)  2 (0,54) |
| *Escolaridad del cuidador*  Ninguna pero sabe leer y escribir  Primaria o menos  Secundaria incompleta  Secundaria completa  Más que secundaria | 4 (1,09)  41(11,14)  59 (16,03)  105 (28,53)  159 (43,21) |
| *Motivo por el que acudió al Centro de Salud*  Compañía  Consulta médica  Control de niño sano  Vacunación | 45 (12,2)  84 (22,83)  56 (15,22)  183 (49,73) |
| *Tiempo de transporte*  *Media*  *(rango)* | 16,6 minutos  1-90 minutos |
| **Niño** |  |
| *Sexo*  Femenino  Masculino | 189 (51,3)  179 (48,6) |
| *Nacionalidad*  Ecuatoriana  Otra | 359 (97,82)  8 (2,18) |
| *Con carne de Vacunación*  Si  No | 251 (68,20)  117 (31,7) |
| *Estado de carné de vacunación*  *Completo*  *Incompleto* | 128 (51)  123 (49) |

Tabla 2 Estado de vacunación por edad

|  | **Total** | **Carné de vacunación completo para la edad** | | **Carné de vacunación incompleto para la edad** | | **No trajeron el carné o no tienen** | |
| --- | --- | --- | --- | --- | --- | --- | --- |
|  | *n* | *n* | *%* | *n* | *%* | *n* | *%* |
| **<2 meses** | 35 | 23 | 65,7 | 8 | 22,9 | 4 | 11,4 |
| **2-3 meses** | 32 | 10 | 31,3 | 12 | 37,5 | 10 | 31,3 |
| **4-5 meses** | 33 | 12 | 36,4 | 7 | 21,2 | 14 | 42,4 |
| **6-11 meses** | 60 | 14 | 23,3 | 27 | 45,0 | 19 | 31,7 |
| **1 año** | 128 | 41 | 32,0 | 53 | 41,4 | 34 | 26,6 |
| **2 años** | 44 | 15 | 34,1 | 9 | 20,5 | 20 | 45,5 |
| **3 años** | 19 | 9 | 47,4 | 1 | 5,3 | 9 | 47,4 |
| **4 años** | 17 | 4 | 23,5 | 6 | 35,3 | 7 | 41,2 |
| **Total** | **368** | **128** |  | **123** |  | **117** |  |

Tabla 3: Motivos de no vacunación. *Contraindicaciones falsas

| **Motivo por el cual no fueron vacunados** | **Pacientes** |
| --- | --- |
| Causas atribuibles a los servicios de salud y de inmunización | |
| Porque no había vacunas | 1 |
| Total | 4,8% |
| Causas atribuibles a los conocimientos, actitudes y prácticas del personal de salud | |
| Porque medico dijo que está enfermo* | 3 |
| Porque médico o enfermera dijo que tiene el esquema completo | 1 |
| Total | 19% |
|  |  |
| Causas Atribuibles a los conocimientos, Actitudes y prácticas de la familia o los encargados de los niños | |
| Porque no lo traje a vacunar | 16 |
| Total | 76,2% |

Tabla 4 Factores de Riesgo relacionados a Oportunidades Perdidas de Vacunación.

| **Factor de riesgo** | **TOTAL** | **OPPV** | | **OR (95% IC)** | **valor p** |
| --- | --- | --- | --- | --- | --- |
| **N** | **%** |
| ***Edad*** |  | | | | |
| menor de 1 año | 188 | 25 | 51 | 1 | 0,419 |
| 1 a 4 años | 180 | 19 | 49 | 0,77 |
| ***Tipo de establecimiento*** |  |  |  |  |  |
| Tipo A* | 259 | 33 | 75 | 1 | 0,675 |
| Tipo B** | 99 | 11 | 25 | 0,86 |
| ***Edad de padre o cuidador*** |  |  |  |  |  |
| menos de 25 años | 151 | 11 | 25 | 1 | **0,024** |
| más de 25 años | 217 | 33 | 75 | 2,28 |
| ***Nivel de educación del padre o cuidador*** |  |  |  |  |  |
| Secundaria o mas | 323 | 43 | 97,7 | 1 | 0,06 |
| Primaria o menos | 45 | 1 | 2,3 | 6,75 |
| ***Ocupación del cuidador*** |  |  |  |  |  |
| Ama de casa | 174 | 16 | 36,6 | 1 | 0,125 |
| Otros trabajos | 194 | 28 | 63,4 | 1,66 |
| ***"Durante esta visita al centro de salud, ¿vacunaron a su hijo?"*** |  |  |  |  |  |
| Si | 167 | 23 | 52,2 | 1 | 0,347 |
| No | 199 | 21 | 47,8 | 1,35 |
| ***"¿El médico le pidió el carné de vacunación hoy?"*** |  |  |  |  |  |
| Si | 336 | 42 | 95,4 | 1 | 0,35 |
| No | 30 | 2 | 4,6 | 1,99 |
| ***"Motivo para visitar el centro de salud"*** |  |  |  |  |  |
| Vacunación | 183 | 23 |  | 1 |  |
| Control de niño sano | 56 | 6 |  | 0,83 | 0,71 |
| Consulta Médica | 84 | 12 |  | 1,16 | 0,70 |
| Compañía | 45 | 3 |  | 0,49 | 0,27 |

* Tipo A: Es un establecimiento del Sistema Nacional de Salud que atiende a una población de 2.000 a 10.000 habitantes. **Tipo B: Es un establecimiento del Sistema Nacional de Salud que atiende a una población de 10.000 a 50.000 habitantes
